# Supplementary material for: Depsipeptide Intermediates Interrogate Proposed Biosynthesis of Cereulide, the Emetic Toxin of Bacillus cereus
Source: PubMed Central journal article supplement (PMC4445039; doi:10.1038/srep10637), 2015-05-27

## Supplementary Information

### Depsipeptide Intermediates Interrogate Proposed Biosynthesis of Cereulide, the Emetic Toxin of *Bacillus cereus*

SANDRA MARXEN,<sup>1</sup> TIMO D. STARK,<sup>1</sup> ANDREA RÜTSCHLE,<sup>2</sup> GENIA LÜCKING,<sup>2</sup> ELRIKE  
FRENZEL,<sup>3</sup> SIEGFRIED SCHERER<sup>2,4</sup>, MONIKA EHLING-SCHULZ,<sup>3</sup> AND THOMAS  
HOFMANN<sup>1\*</sup>

**Figure S1** Sequential MS<sup>n</sup>-spectra of the ethyl esters of (a) tetradepsipeptide (**DP4**), (b) hexadepsipeptide (**DP6a**), (c) hexadepsipeptide (**DP6b**), (d) octadepsipeptide (**DP8**), (e) decadepsipeptide (**DP10a**), (f) decadepsipeptide (**DP10b**), and (g) dodecadepsipeptide (**DP12**) (upper masses: calculated, lower masses given in parenthesis: measured ([M+K]<sup>+</sup>) and ([M+Na]<sup>+</sup>)\* ions), ●: <sup>13</sup>C-labeling of α-hydroxy isovaleric acid and valine.

### a) Tetrapeptide (DP4)

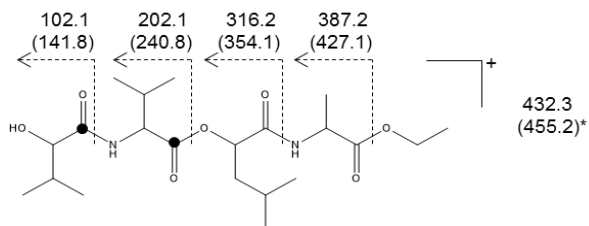

### MS

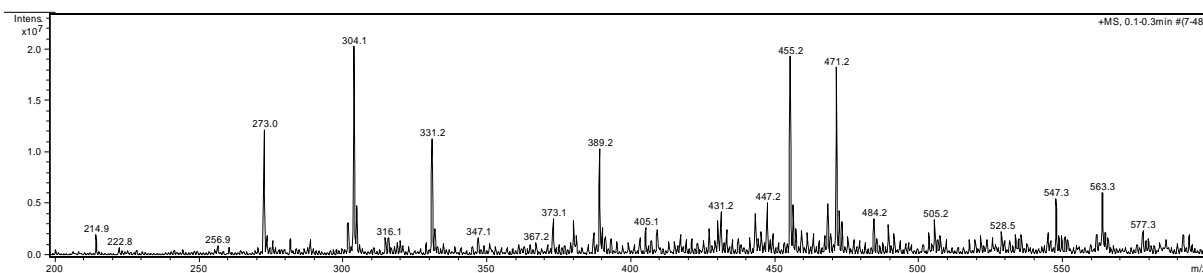

### MS<sup>2</sup> (455.2 $\rightarrow$ x)

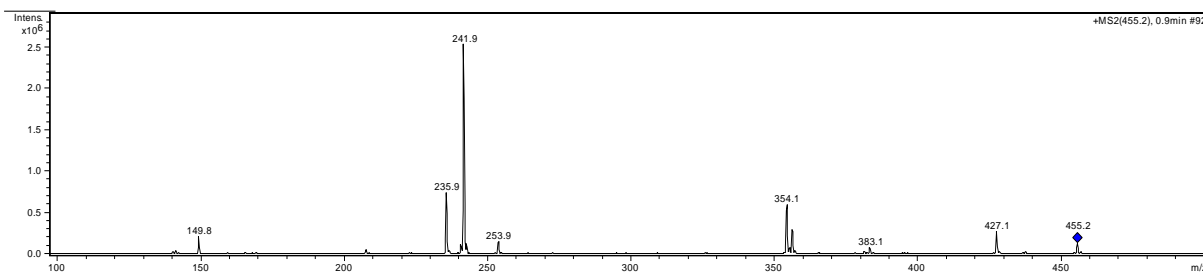

### MS<sup>3</sup> (354.1 $\rightarrow$ x)

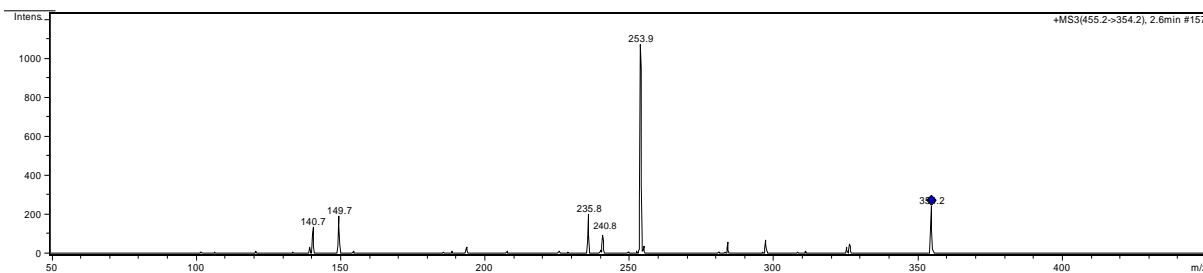

### MS<sup>4</sup> (240.8 $\rightarrow$ x)

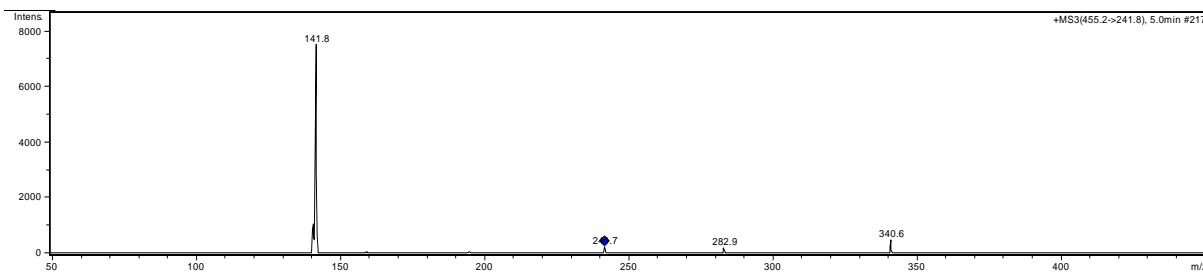

## b) Hexadepsipeptide (DP6a)

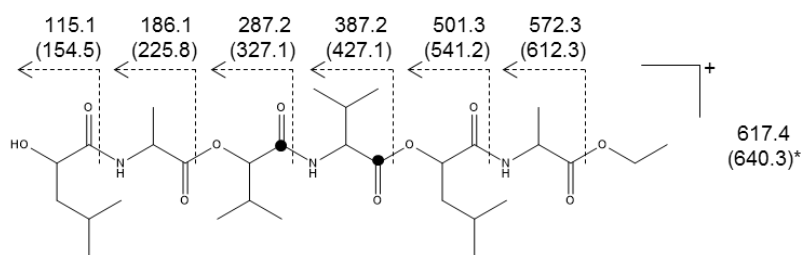

## MS

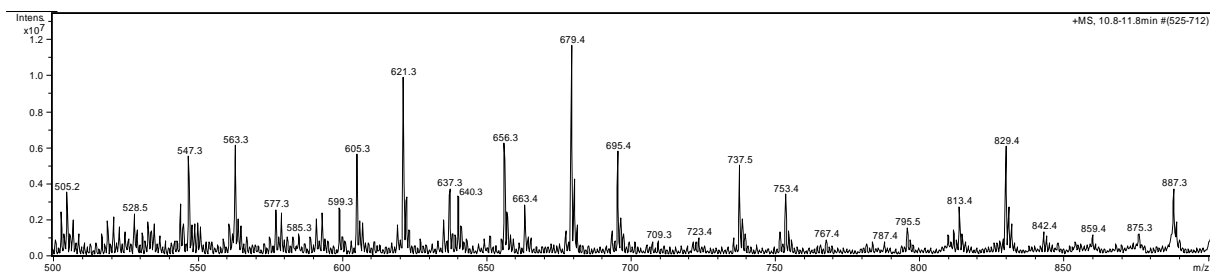

## MS<sup>2</sup> (640.3 → x)

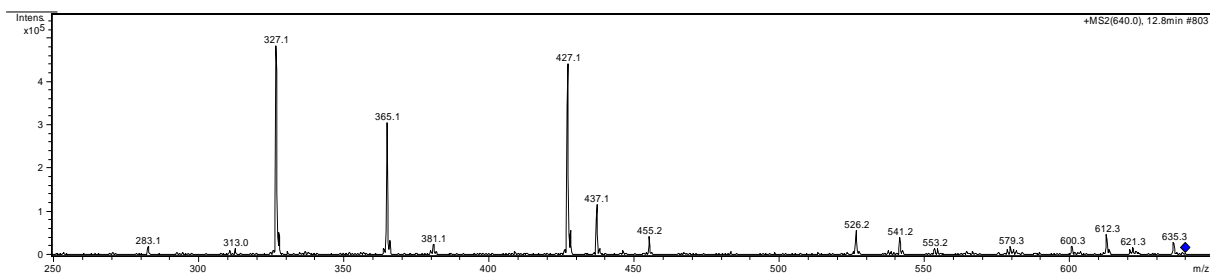

## MS<sup>3</sup> (427.1 → x)

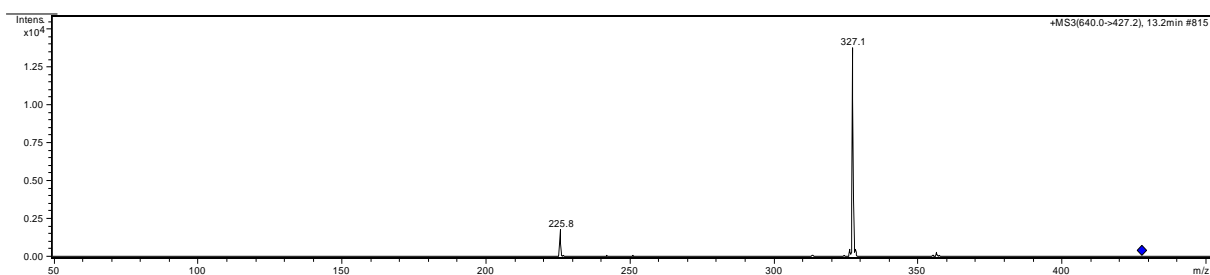

## MS<sup>4</sup> (327.1 → x)

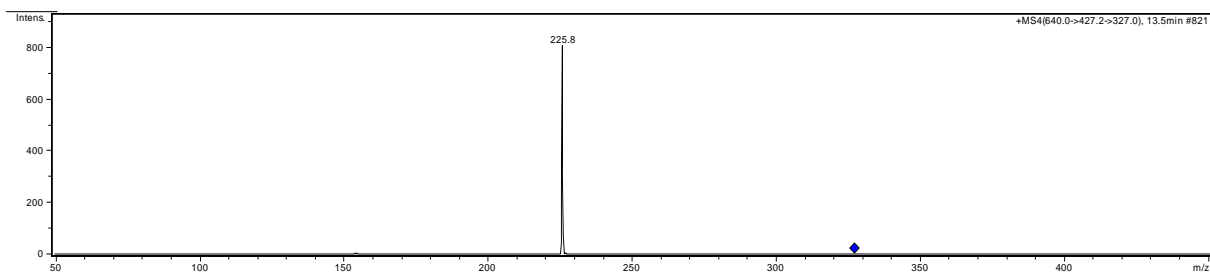

### MS<sup>4</sup> (225.8 → x)

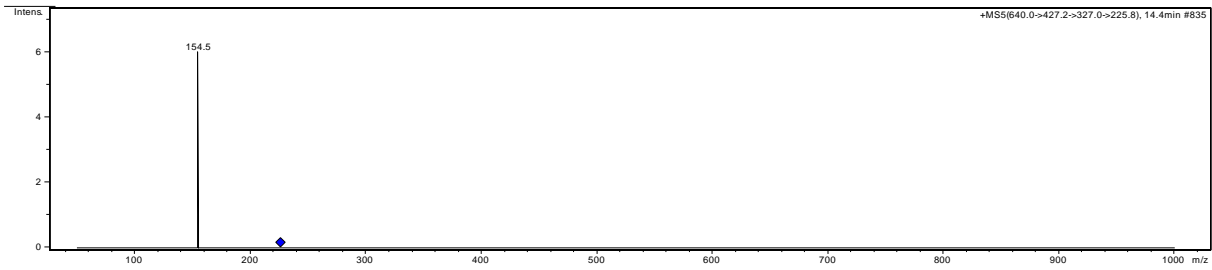

### c) Hexadepsipeptide (DP6b)

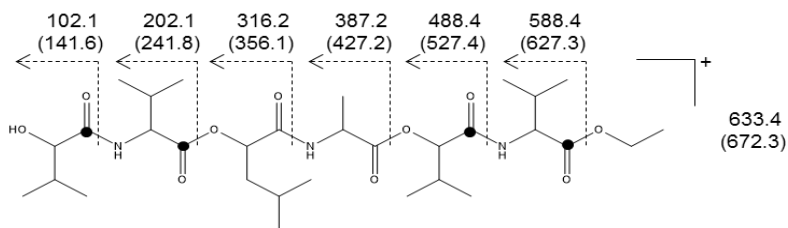

### MS

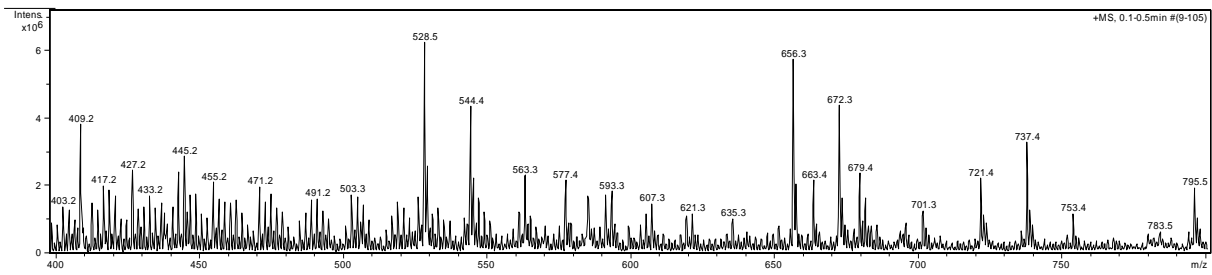

### MS<sup>2</sup> (672.3 → x)

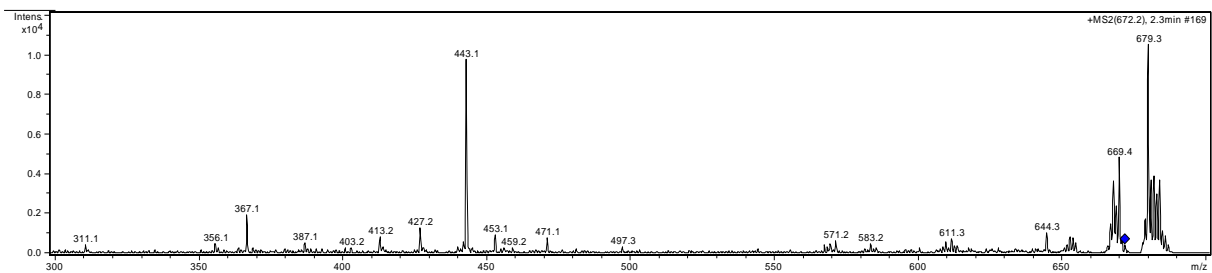

### MS<sup>3</sup> (427.2 → x)

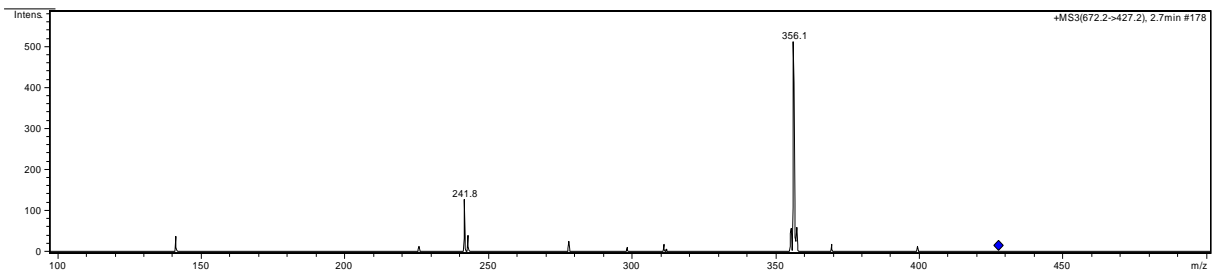

### MS<sup>4</sup> (356.1 → x)

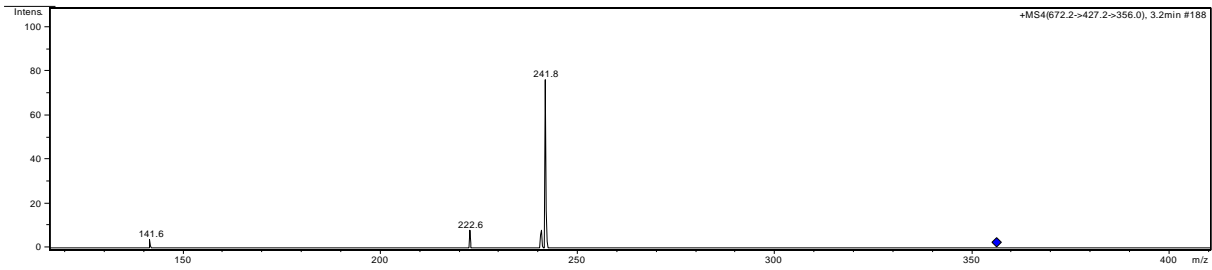

### d) Octadepsipeptide (DP8)

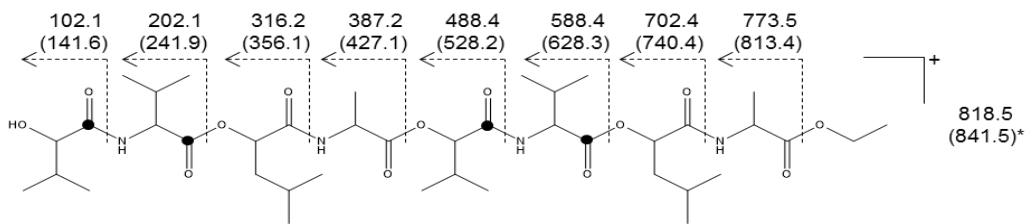

### MS

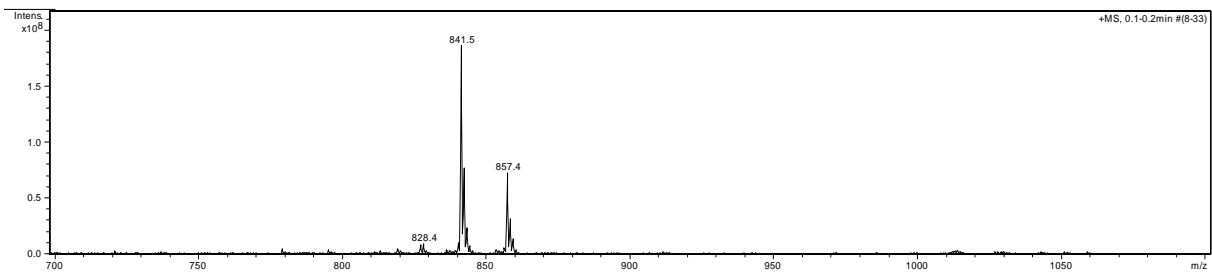

### MS<sup>2</sup> (841.5 → x)

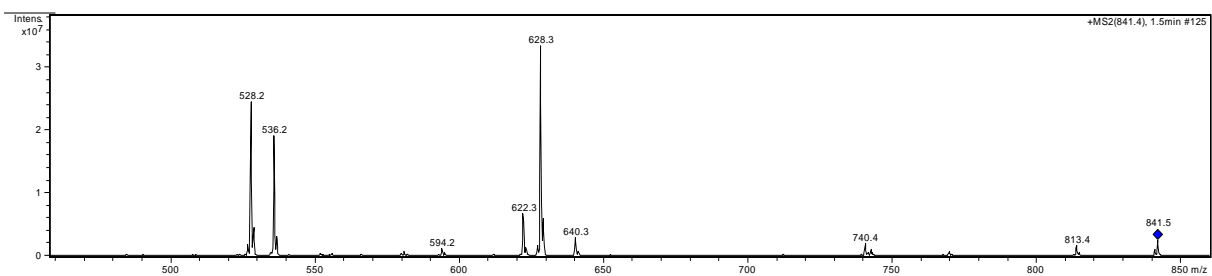

### MS<sup>3</sup> (628.3 → x)

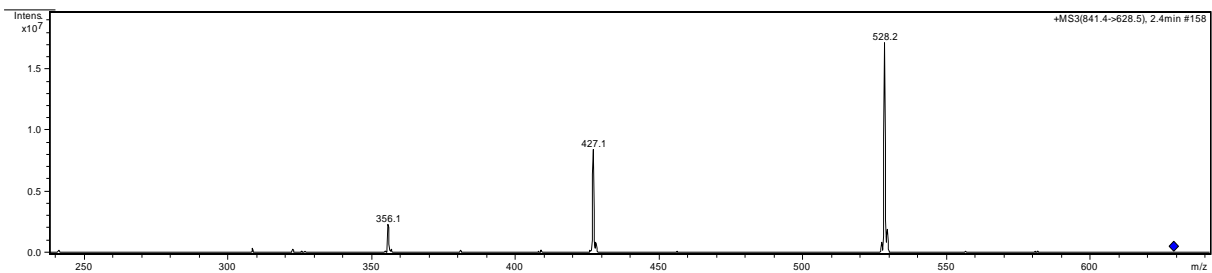

MS<sup>4</sup> (528.2 → x)

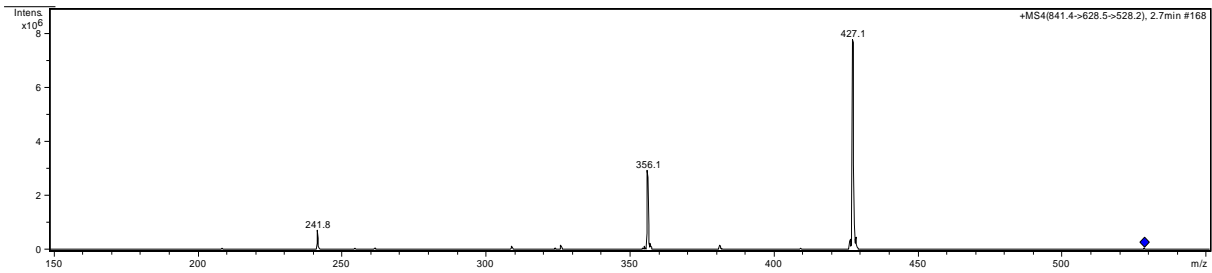

MS<sup>5</sup> (427.1 → x)

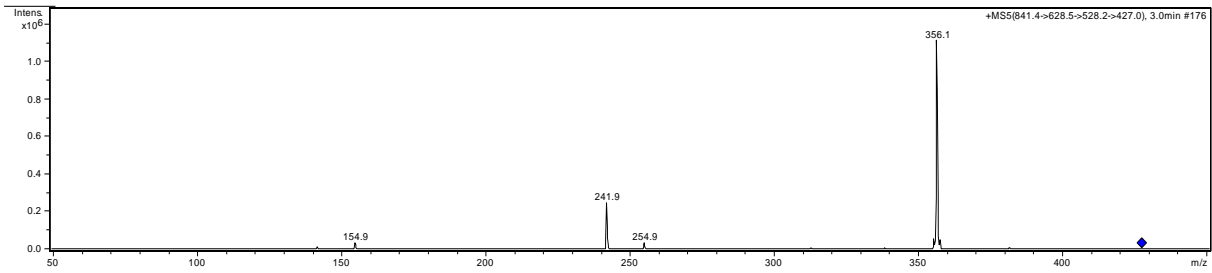

MS<sup>6</sup> (356.1 → x)

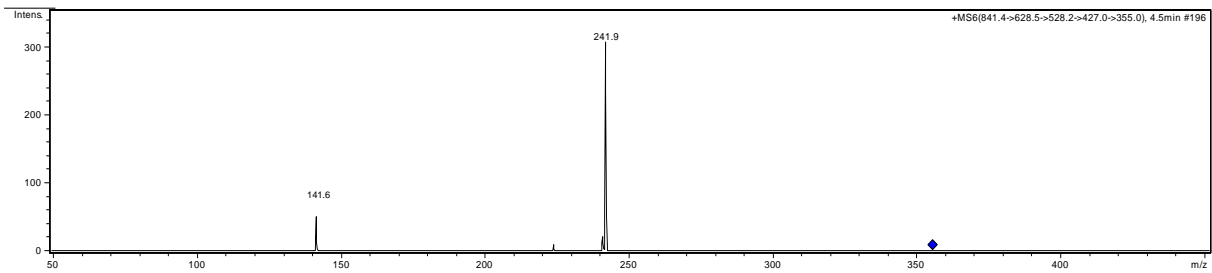

e) Decadepsipeptide (DP10a)

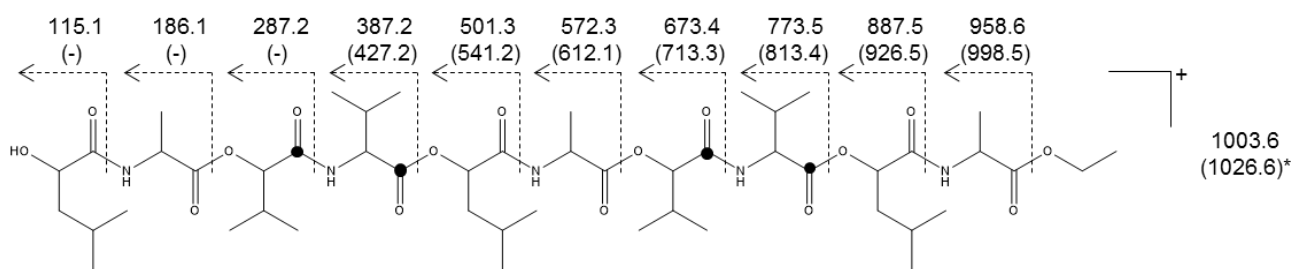

MS

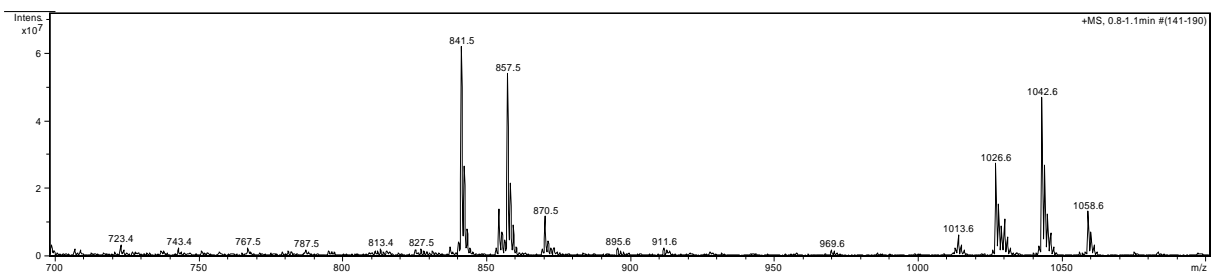

### MS<sup>2</sup> (1026.6 → x)

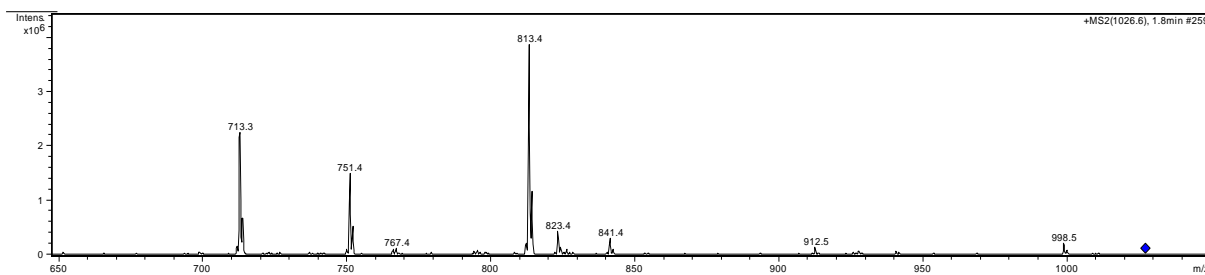

### MS<sup>3</sup> (813.4 → x)

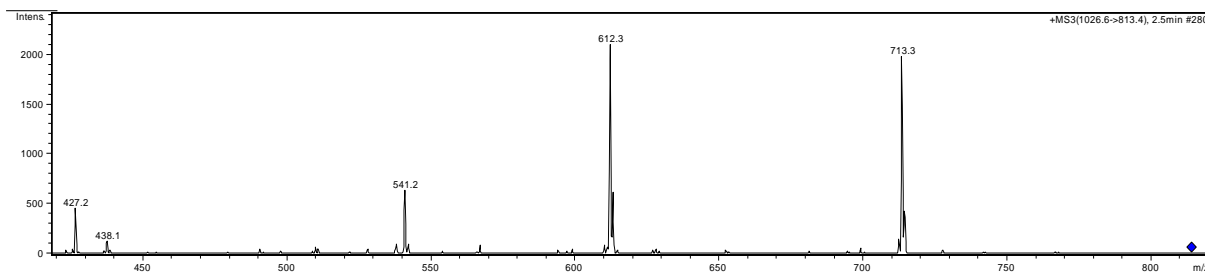

### MS<sup>4</sup> (713.3 → x)

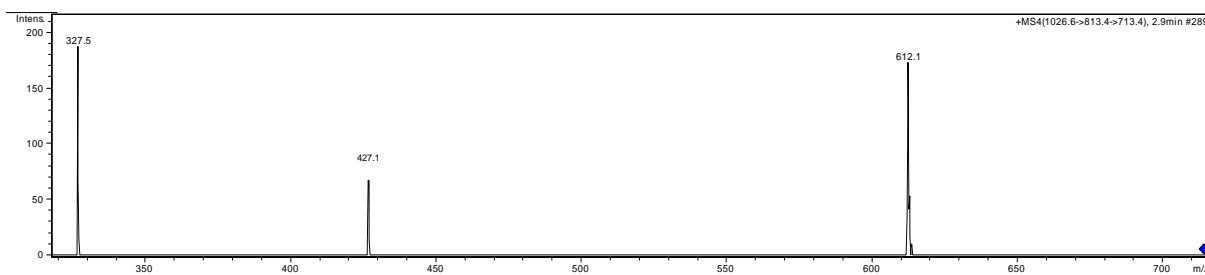

### MS<sup>5</sup> (612.1 → x)

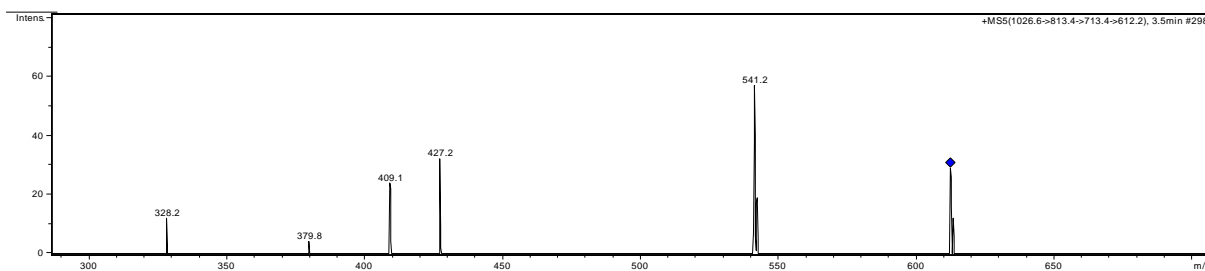

### MS<sup>6</sup> (541.2 → x)

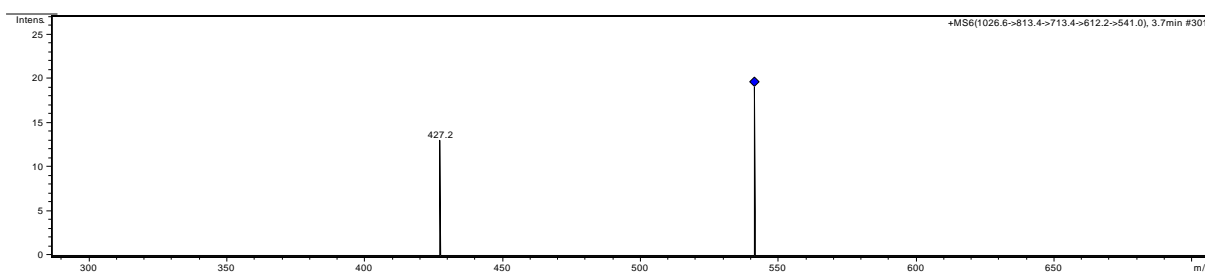

f) Decadepsipeptide (DP10b)

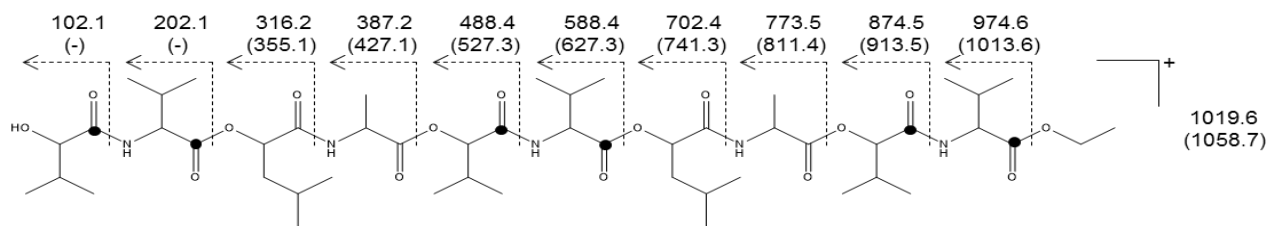

MS

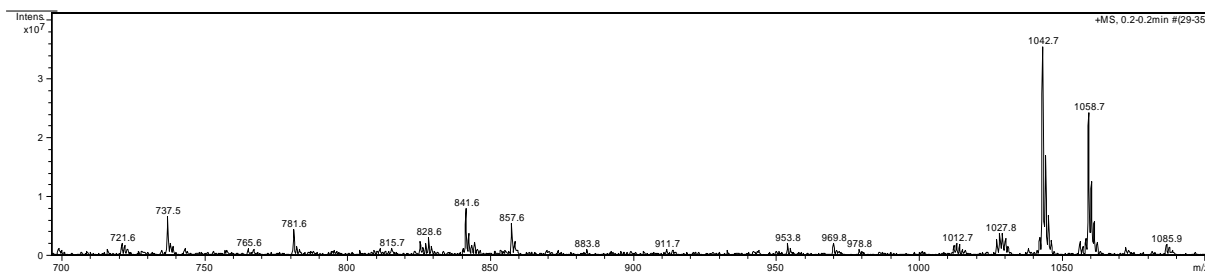

MS<sup>2</sup> (1058.7 → x)

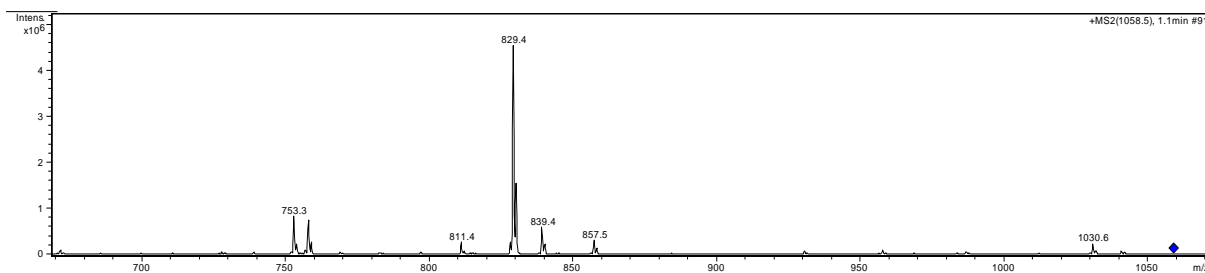

MS<sup>3</sup> (811.4 → x)

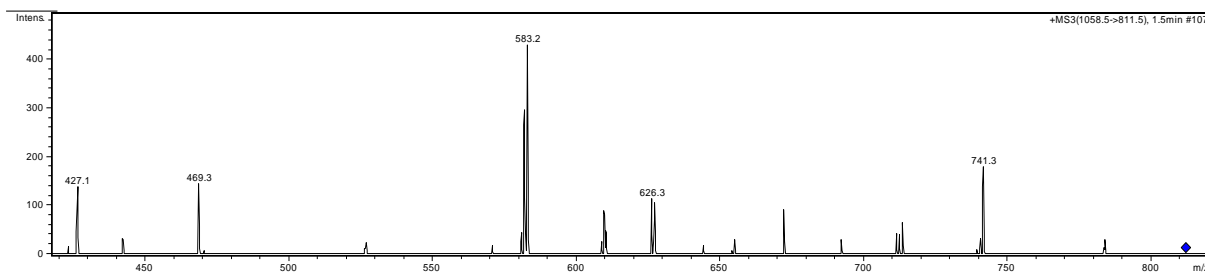

MS<sup>4</sup> (741.3 → x)

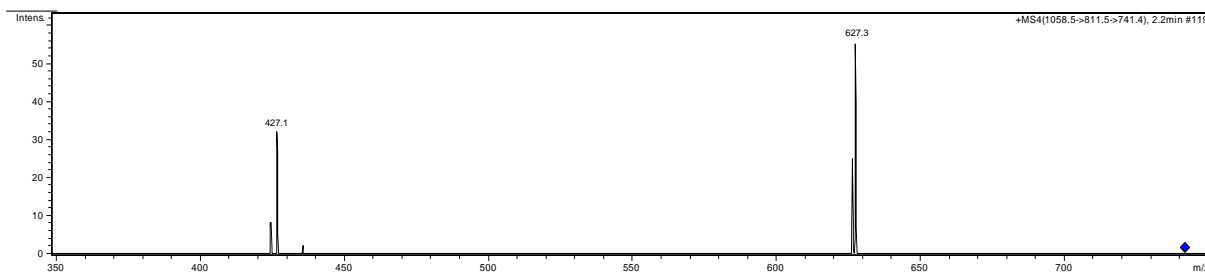



MS<sup>5</sup> (627.3 → x)

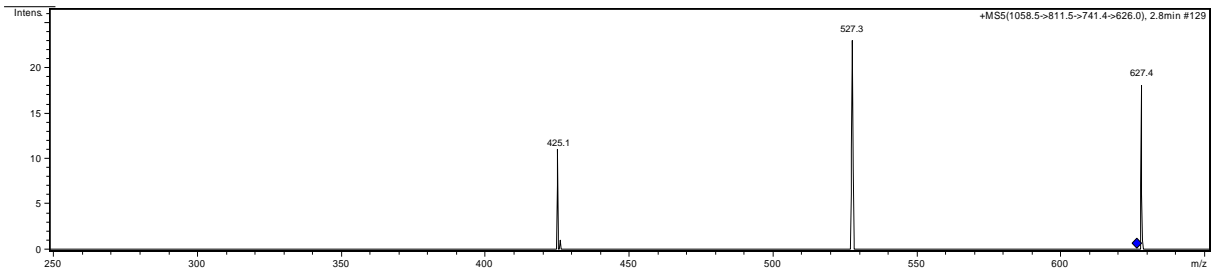

MS<sup>6</sup> (527.3 → x)

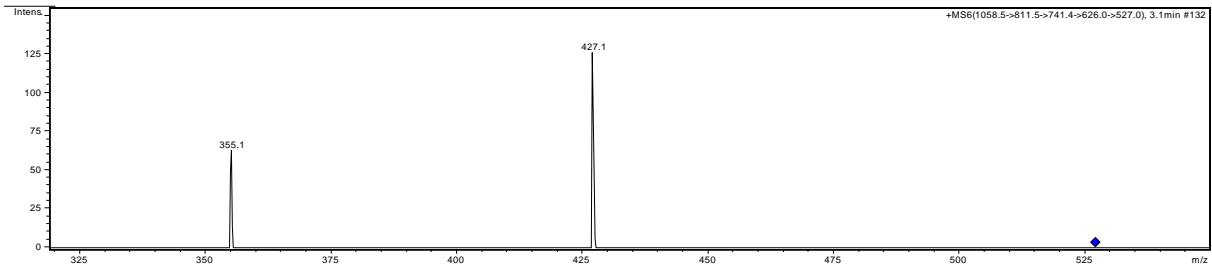

g) Dodecadeptide (DP12)

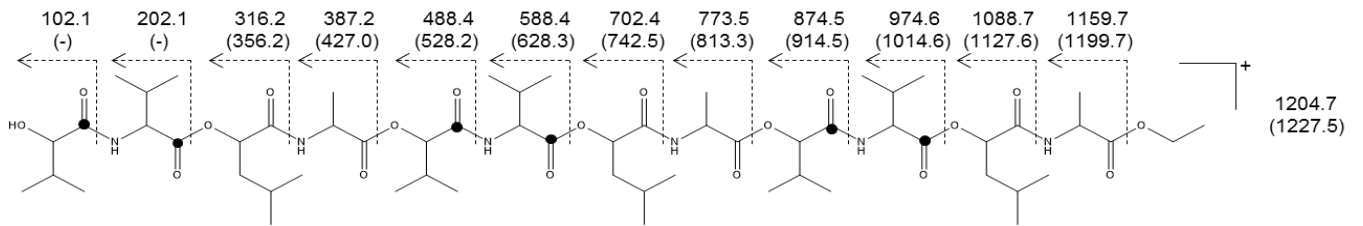

MS

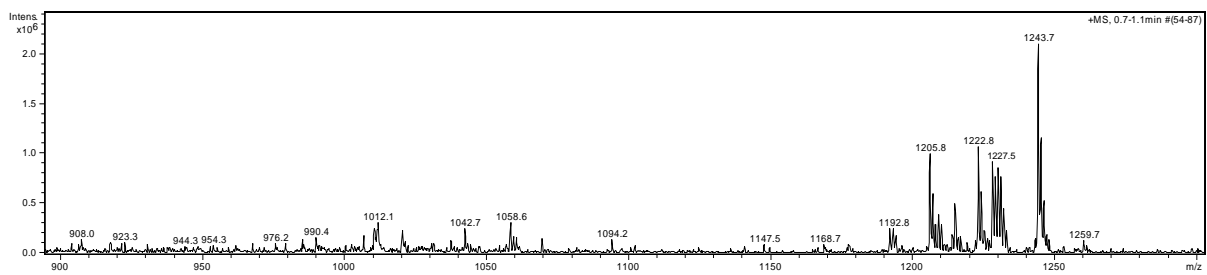

MS<sup>2</sup> (1227.5 → x)

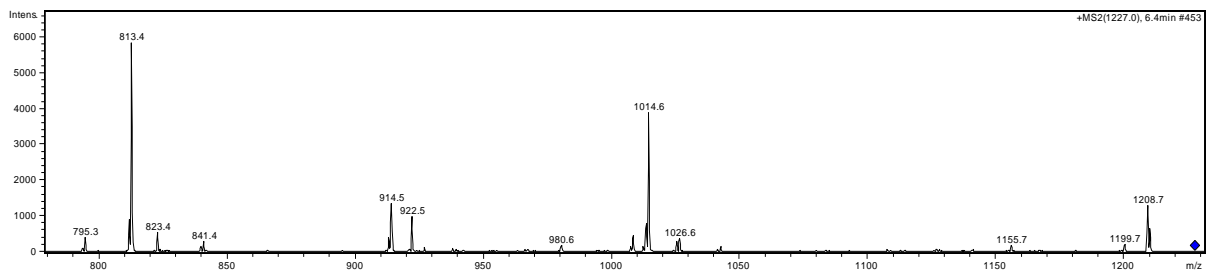

### MS<sup>3</sup> (1014.6 → x)

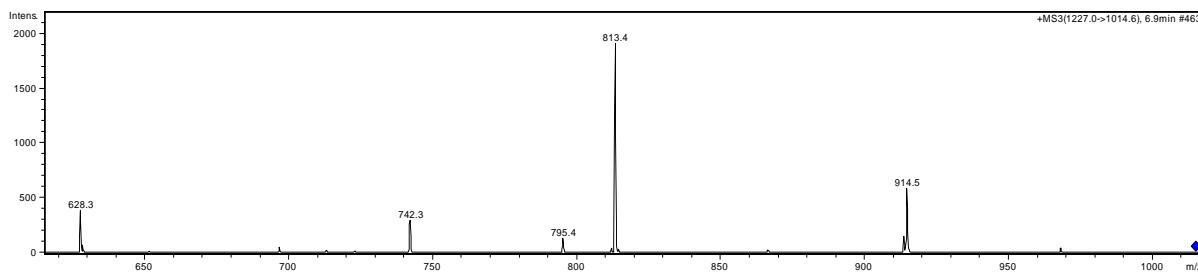

### MS<sup>4</sup> (914.5 → x)

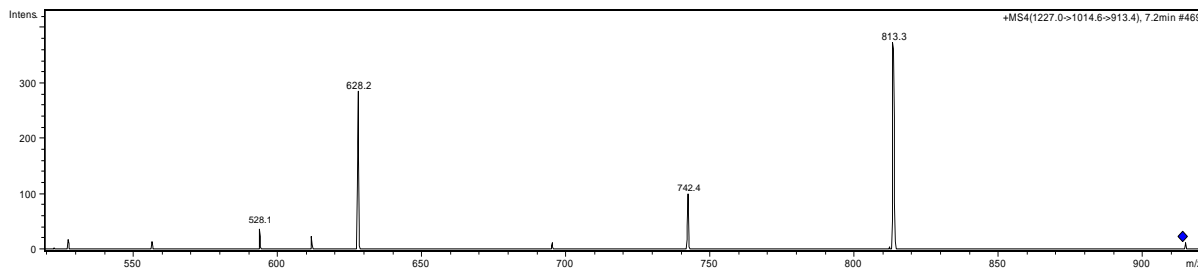

### MS<sup>5</sup> (813.3 → x)

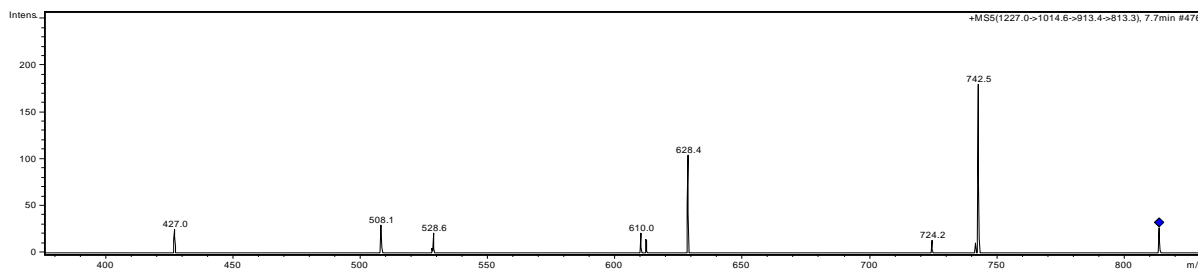

### MS<sup>6</sup> (742.5 → x)

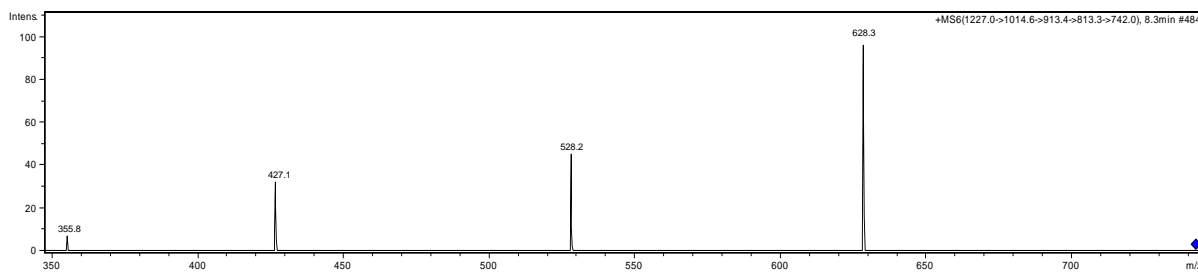

### MS<sup>7</sup> (628.3 → x)

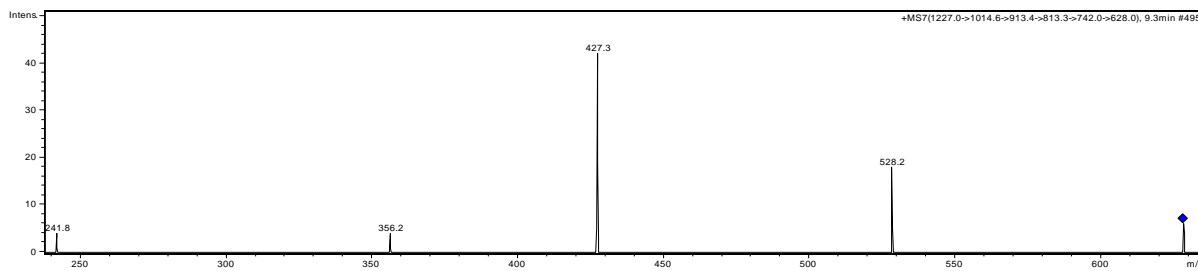

MS<sup>8</sup> (528.2 → x)

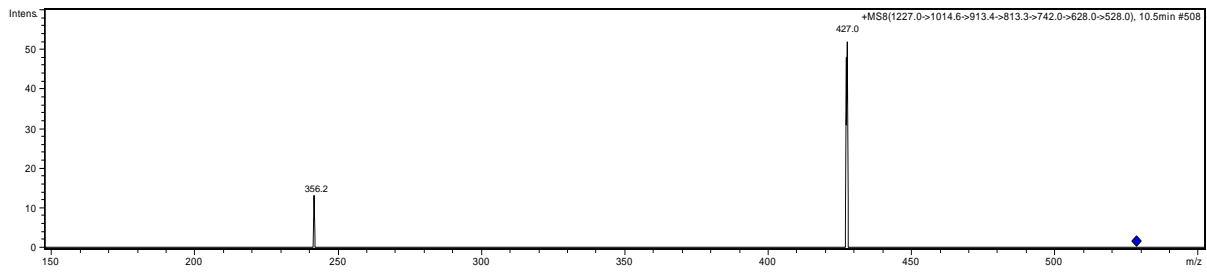

**Figure S2** UPLC-TOF MS (ESI<sup>+</sup>) analysis of <sup>13</sup>C<sub>6</sub>-cereulide and cereulide in a *B. cereus* culture (F4810/72) incubated in the presence of synthetic <sup>13</sup>C<sub>6</sub>-cereulide (two biological and three analytical replicates each, ±SD).

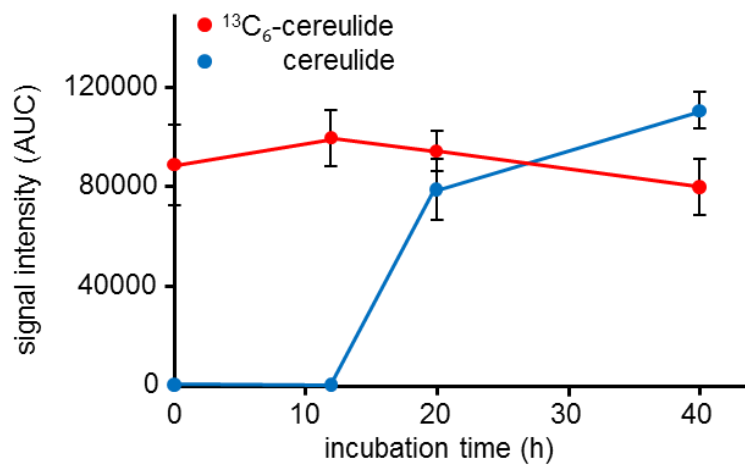

Supplement: srep10637-s1.pdf [file srep10637-s1.pdf]
